# Supplementary material for: Sensitivity enhancement via multiple contacts in the {1H–29Si}–1H cross polarization experiment: a case study of modified silica nanoparticle surfaces
Source: Royal Society of Chemistry journal article supplement (doi:10.1039/d0ra04995f), 2020-01-01
Supplement: d0ra04995f1.pdf [file d0ra04995f1.pdf]

## Supplementary Information

### Sensitivity enhancement *via* multiple contacts in the $\{^1\text{H}-^{29}\text{Si}\}$ - $^1\text{H}$ cross polarization experiment: A case study of modified silica nanoparticle surfaces

Chuanyu Yan,<sup>a,b</sup> François Kayser<sup>c</sup> and Reiner Dieden<sup>\*a</sup>

<sup>a</sup>. *Luxembourg Institute of Science and Technology, Department "Materials Research and Technology", Avenue des Hauts-Fourneaux, L-4362 Esch-sur-Alzette, Luxembourg.*

<sup>b</sup>. *University of Luxembourg, Faculty of Science, Technology and Communication, Avenue des Hauts-Fourneaux, L-4365 Esch-sur-Alzette, Luxembourg.*

<sup>c</sup>. *Goodyear Innovation Center Luxembourg, Avenue Gordon Smith, L-7750 Colmar-Berg, Luxembourg.*

\*Corresponding Author: [reiner.dieden@list.lu](mailto:reiner.dieden@list.lu)

Telephone : (+352) 275 888 4576

Fax : (+352) 275 885.

Part 1, Details of solid-state NMR pulse sequences.

Part 2, Supplementary data.

# Supplementary Information

## Part 1, Solid-State NMR pulse sequences and experiments.

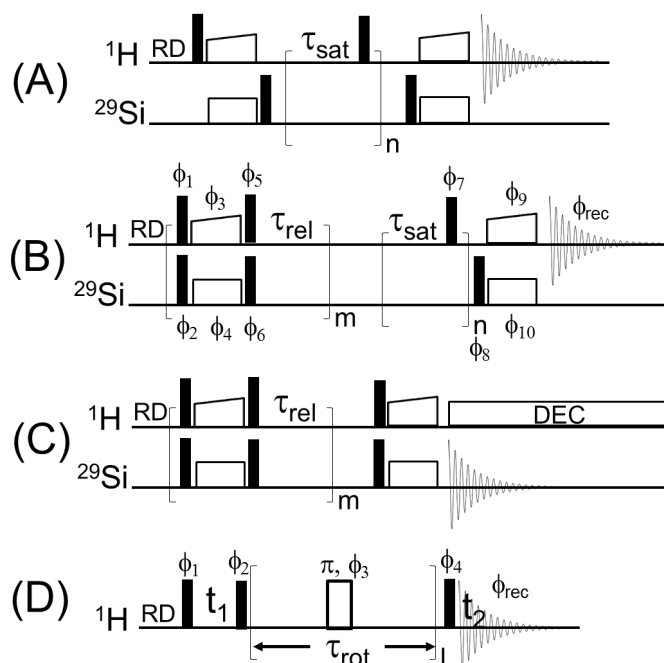

**Fig. S1 Pulse sequences.** (A)  $\{^1\text{H}-^{29}\text{Si}\}-^1\text{H}$  double cross-polarization inverse detection (DCPi), phases of pulses and receiver are the same as given in Babonneau's work.<sup>1</sup> (B)  $\{^1\text{H}-^{29}\text{Si}\}-^1\text{H}$  multiple cross-polarization reverse detection (MCPi), phases of pulses and receiver are as follows:  $\phi_1 = \phi_2 = \{x, x, -x, -x\}$ ,  $\phi_3 = \phi_4 = \{y\}$ ,  $\phi_5 = \phi_6 = \{-x, -x, x, x\}$ ,  $\phi_7 = \{x\}$ ,  $\phi_8 = \{x, -x\}$ ,  $\phi_9 = \{x^*4, -x^*4, y^*4, -y^*4\}$ ,  $\phi_{10} = \{y\}$ ,  $\phi_{\text{rec}} = \{x, -x, x, -x, -x, x, -x, x, y, -y, y, -y, -y, y, -y, y\}$ . (C)  $\{^1\text{H}\}-^{29}\text{Si}$  multiple cross-polarization (multiCP). The phases of pulses and receiver are the same as given in the original work.<sup>2</sup> (D)  $^1\text{H}-^1\text{H}$  radio frequency driven recoupling correlation spectroscopy (RFDR), phases of pulses and receiver are as follows:  $\phi_1 = \{x, -x\}$ ,  $\phi_2 = \{x^*8, -x^*8\}$ ,  $\phi_3 = \{\{x, y, x, y, y, x, y, x\}\}$ ,  $\phi_4 = \{x, x, -x, -x, y, y, -y, -y\}$ ,  $\phi_{\text{rec}} = \{x, -x, x, -x, y, -y, -y, y, -x, x, x, -x, -y, y, y, -y\}$ . The phase cycling of the RFDR part ( $\phi_3$ ) was adopted from Griffin's work.<sup>3</sup>

# Supplementary Information

## Part 2, Supplementary data.

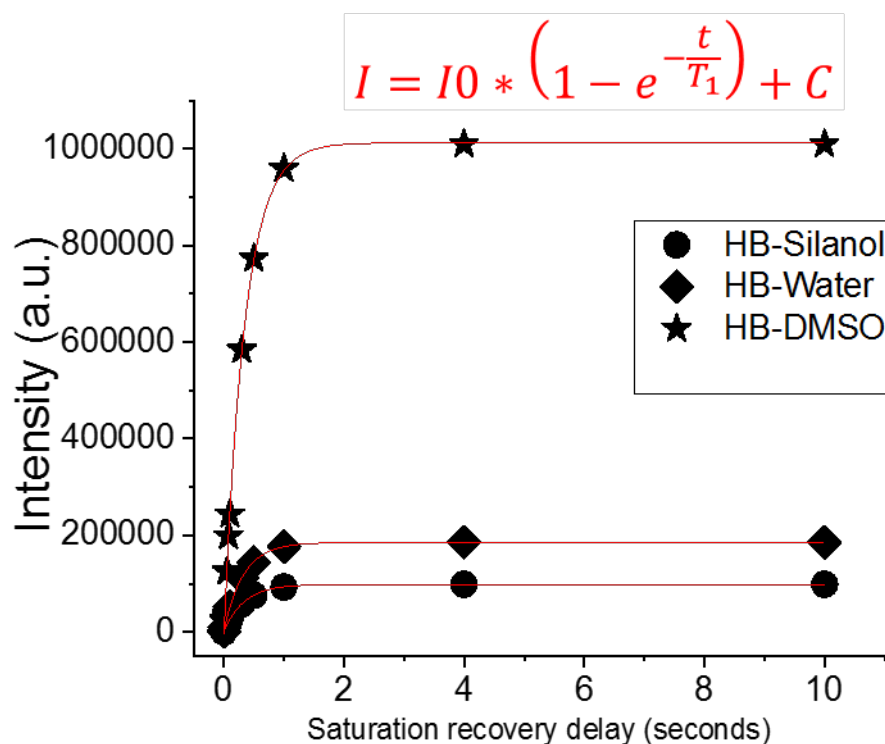

**Fig. S2** Proton spin-lattice relaxation constant ( $T_1^H$ ) measurement of the DMSO- $h_6$ -adsorbed SiNP using standard saturation recovery pulse sequence, where delay between two consecutive  $90^\circ$  pulses ( $\tau_{\text{sat}}$ ) = 1 ms, total number of  $90^\circ$  pulses ( $n$ ) = 64. The  $T_1$ 's were obtained by fitting the peak intensities to a single exponential function (embedded in the figure). The fitting was performed using the software OriginPro 2018 (64-bit) SR1. The standard errors were estimated by the fitting errors.

## Supplementary Information

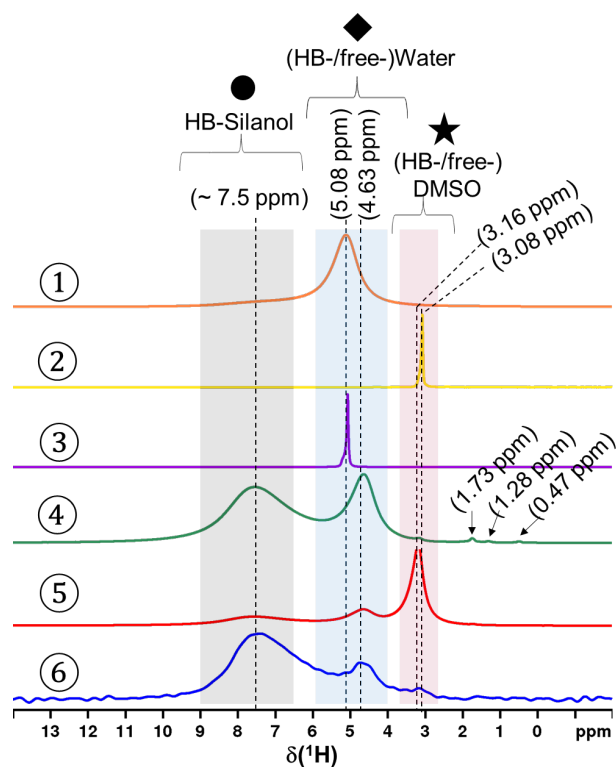

**Fig. S3**  $^1\text{H}$  reference spectra used for the chemical shift assignments of silanol, water and DMSO. These spectra were obtained from the  $^1\text{H}$  onepulse (① to ⑤) and  $\{^1\text{H}-^{29}\text{Si}\}-^1\text{H}$  (⑥) DCPi ssNMR experiments. Samples used for obtaining these spectra are ① “SiNP-as received”, ② liquid DMSO- $\text{H}_6$ , ③ liquid water, ④ DMSO- $\text{d}_6$ -adsorbed SiNP and ⑤&⑥ DMSO- $\text{H}_6$ -adsorbed SiNP, respectively. For spectra ① to ③, RD = 2 s and NS = 4. For spectra ④&⑤, RD = 4 s and NS = 4. For spectrum ⑥, RD = 4 s, NS = 2048,  $t_{\text{cp}1} = t_{\text{cp}2} = 5$  ms.

## Supplementary Information

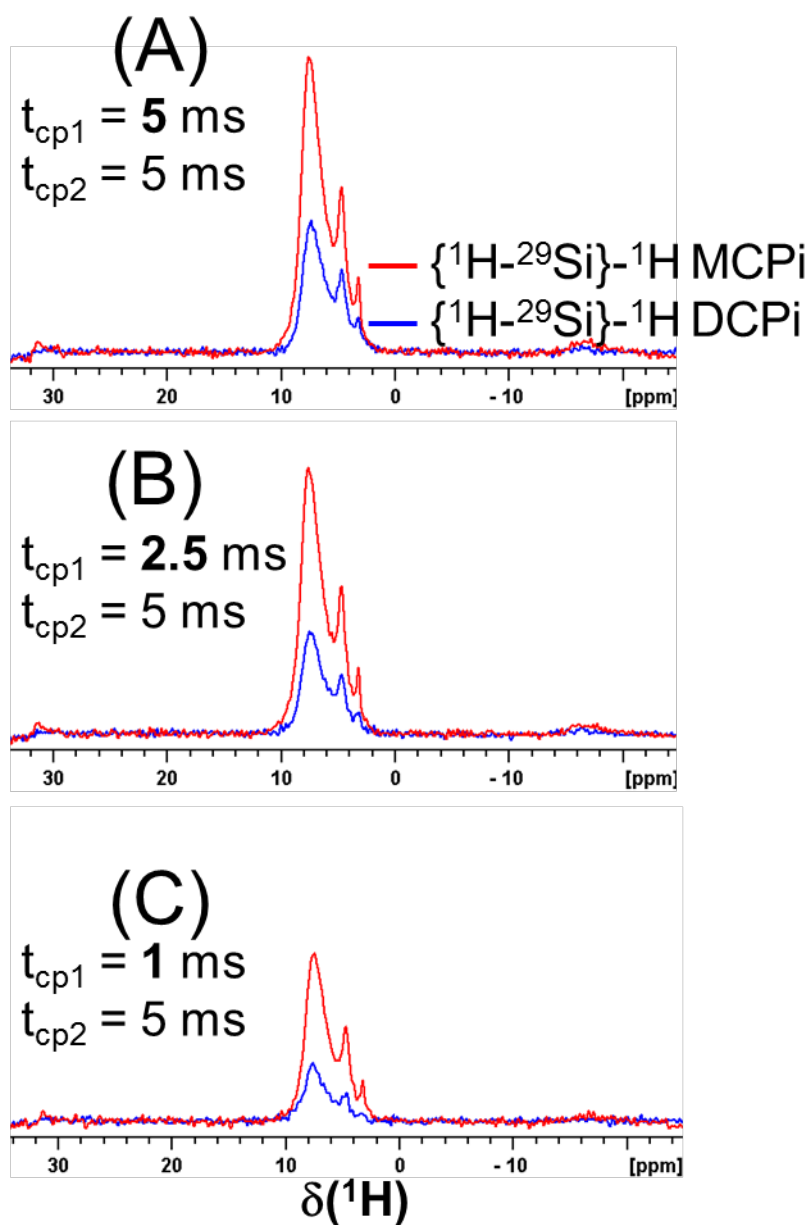

**Fig. S4** The sensitivity comparison between  $\{^1\text{H}-^{29}\text{Si}\}-^1\text{H}$  MCPi and DCPi ( $\text{RD} = 0.44 \text{ s}$ ,  $t_{cp1} = 1.0, 2.5 \text{ \& } 5.0 \text{ ms}$ ,  $t_{cp2} = 5 \text{ ms}$ ,  $m = 3$  for MCPi). Sample is DMSO-adsorbed SiNP (SiNP: DMSO- $\text{h}_6 = 0.20 \text{ g} : 0.11 \text{ g}$ ).

## Supplementary Information

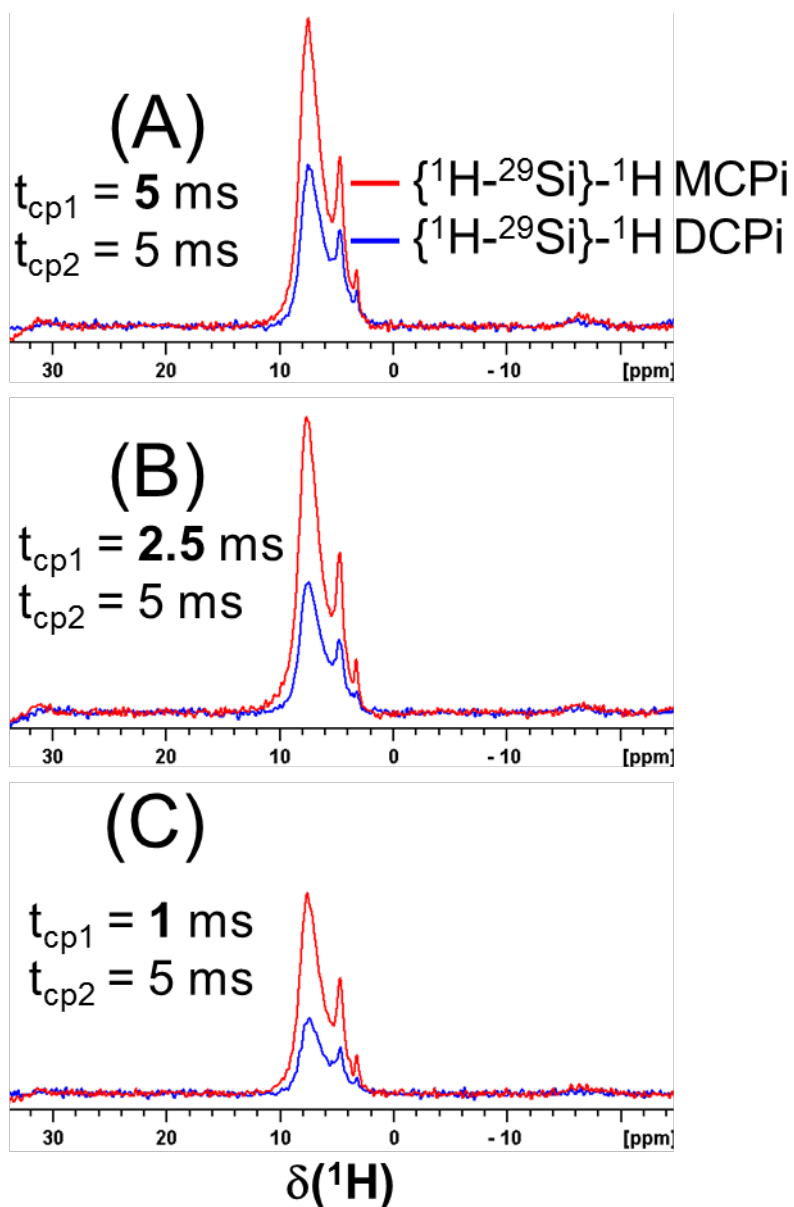

**Fig. S5** The sensitivity comparison between  $\{^1\text{H}-^{29}\text{Si}\}-^1\text{H}$  MCPi and DCPI (RD = 4.0 s,  $t_{cp1}$  = 1.0, 2.5 & 5.0 ms,  $t_{cp2}$  = 5 ms,  $m$  = 3 for MCPi). Sample is DMSO-adsorbed SiNP (SiNP: DMSO- $\text{h}_6$  = 0.20 g : 0.11 g).

## Supplementary Information

**Table S1.** Comparison of the signal-to-noise ratio (S/N) between MCPi and DCPi sequences for DMSO-adsorbed SiNP (SiNP: DMSO-h<sub>6</sub> = 0.20 g : 0.11 g).

| $t_{cp1}/ms$                                          | DCPi Experiment (RD = 0.44 s)    |                                       |                                     |                                    |
|-------------------------------------------------------|----------------------------------|---------------------------------------|-------------------------------------|------------------------------------|
|                                                       | Experiment time per scan, Expt/s | S/N for Silanol peak (6.5 to 8.0 ppm) | S/N for water peak (4.0 to 5.0 ppm) | S/N for DMSO peak (2.9 to 3.5 ppm) |
| 1.00                                                  | 0.5600                           | 17.61                                 | 8.51                                | 2.10                               |
| 2.50                                                  | 0.5615                           | 29.43                                 | 16.93                               | 6.00                               |
| 5.00                                                  | 0.5640                           | 37.62                                 | 23.70                               | 9.94                               |
| $t_{cp1}/ms$                                          | MCPi Experiment (RD = 0.44 s)    |                                       |                                     |                                    |
|                                                       | Experiment time per scan, Expt/s | S/N for Silanol peak (6.5 to 8.0 ppm) | S/N for water peak (4.0 to 5.0 ppm) | S/N for DMSO peak (2.9 to 3.5 ppm) |
| 1.00                                                  | 2.6620                           | 41.70                                 | 23.43                               | 9.94                               |
| 2.50                                                  | 2.6665                           | 59.84                                 | 33.25                               | 14.87                              |
| 5.00                                                  | 2.6740                           | 82.18                                 | 45.92                               | 20.83                              |
| Note: the noise region was defined from 15 to 25 ppm. |                                  |                                       |                                     |                                    |

## Supplementary Information

**Table S2.** Comparison of the signal-to-noise ratio (S/N) between MCPi and DCPi sequences for DMSO-adsorbed SiNP (SiNP: DMSO- $h_6$  = 0.20 g : 0.11 g).

| $t_{cp1}/ms$                                          | DCPi Experiment (RD = 4.0 s)     |                                       |                                     |                                    |
|-------------------------------------------------------|----------------------------------|---------------------------------------|-------------------------------------|------------------------------------|
|                                                       | Experiment time per scan, Expt/s | S/N for Silanol peak (6.5 to 8.0 ppm) | S/N for water peak (4.0 to 5.0 ppm) | S/N for DMSO peak (2.9 to 3.5 ppm) |
| 1.00                                                  | 4.1200                           | 18.95                                 | 11.51                               | 3.93                               |
| 2.50                                                  | 4.1215                           | 35.83                                 | 19.86                               | 5.74                               |
| 5.00                                                  | 4.1240                           | 48.69                                 | 28.96                               | 10.83                              |
| $t_{cp1}/ms$                                          | MCPi Experiment (RD = 4.0 s)     |                                       |                                     |                                    |
|                                                       | Experiment time per scan, Expt/s | S/N for Silanol peak (6.5 to 8.0 ppm) | S/N for water peak (4.0 to 5.0 ppm) | S/N for DMSO peak (2.9 to 3.5 ppm) |
| 1.00                                                  | 6.2220                           | 62.73                                 | 36.08                               | 11.93                              |
| 2.50                                                  | 6.2265                           | 66.44                                 | 35.96                               | 11.90                              |
| 5.00                                                  | 6.2340                           | 94.04                                 | 51.84                               | 17.17                              |
| Note: the noise region was defined from 15 to 25 ppm. |                                  |                                       |                                     |                                    |

## Supplementary Information

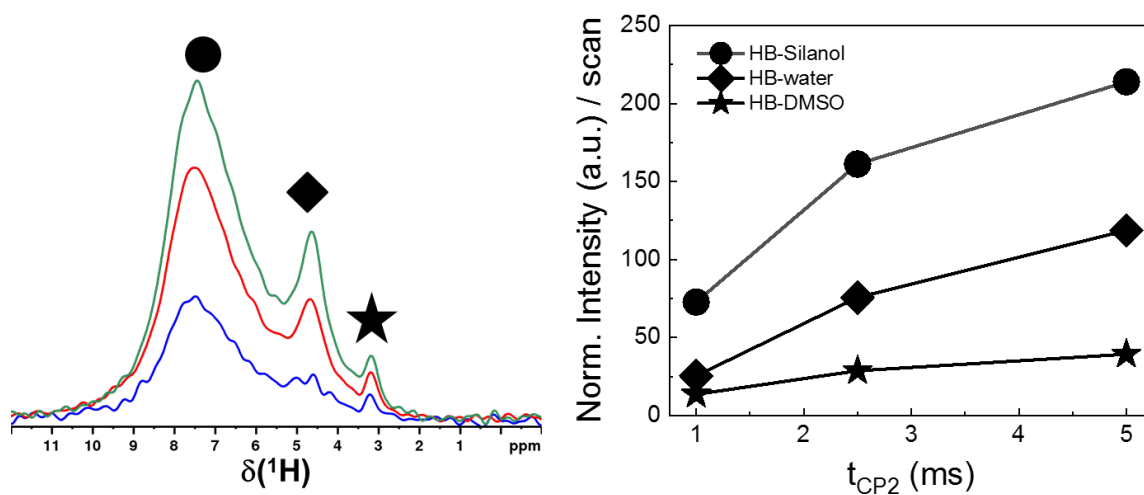

**Fig. S6** The sensitivity dependence on  $t_{\text{cp2}}$  in the  $\{^1\text{H}\text{-}^{29}\text{Si}\}\text{-}^1\text{H}$  MCPi experiment ( $t_{\text{cp1}} = 5$  ms,  $t_{\text{cp2}} = \text{variable}$ ,  $m = 3$ ). Sample is DMSO-adsorbed SiNP (SiNP: DMSO- $\text{h}_6 = 0.20$  g : 0.11 g).

## Supplementary Information

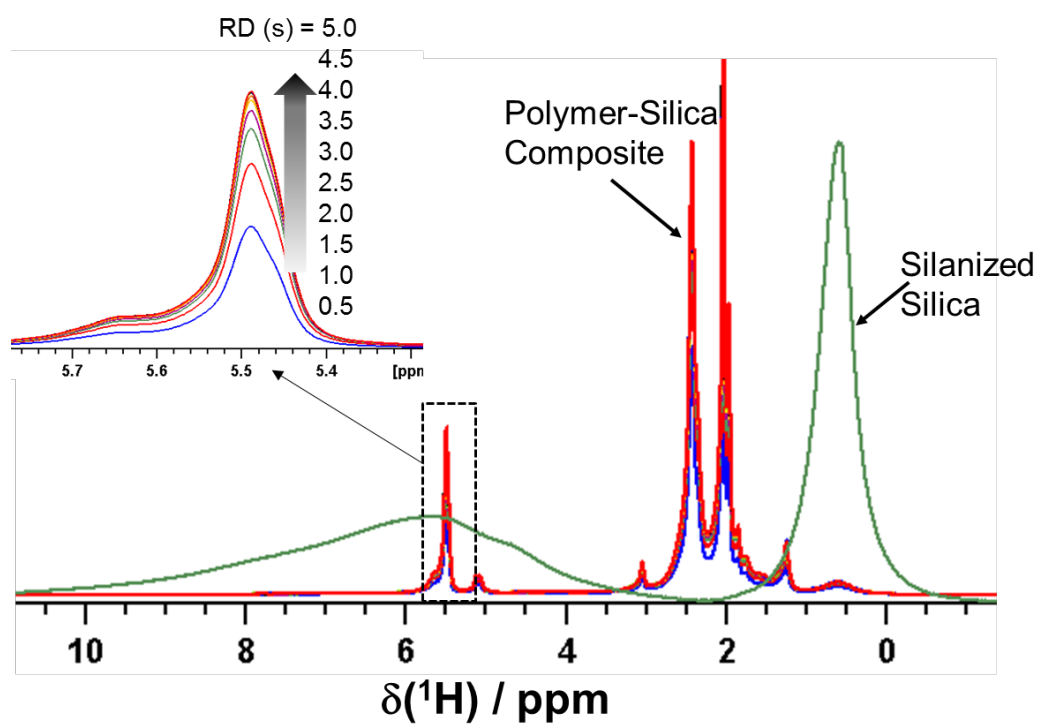

**Fig. S7**  $^1\text{H}$  one-pulse spectra of silanized silica (RD = 4.0 s) and polymer-silica composite (RD = 0.5 to 5.0 s).

## Supplementary Information

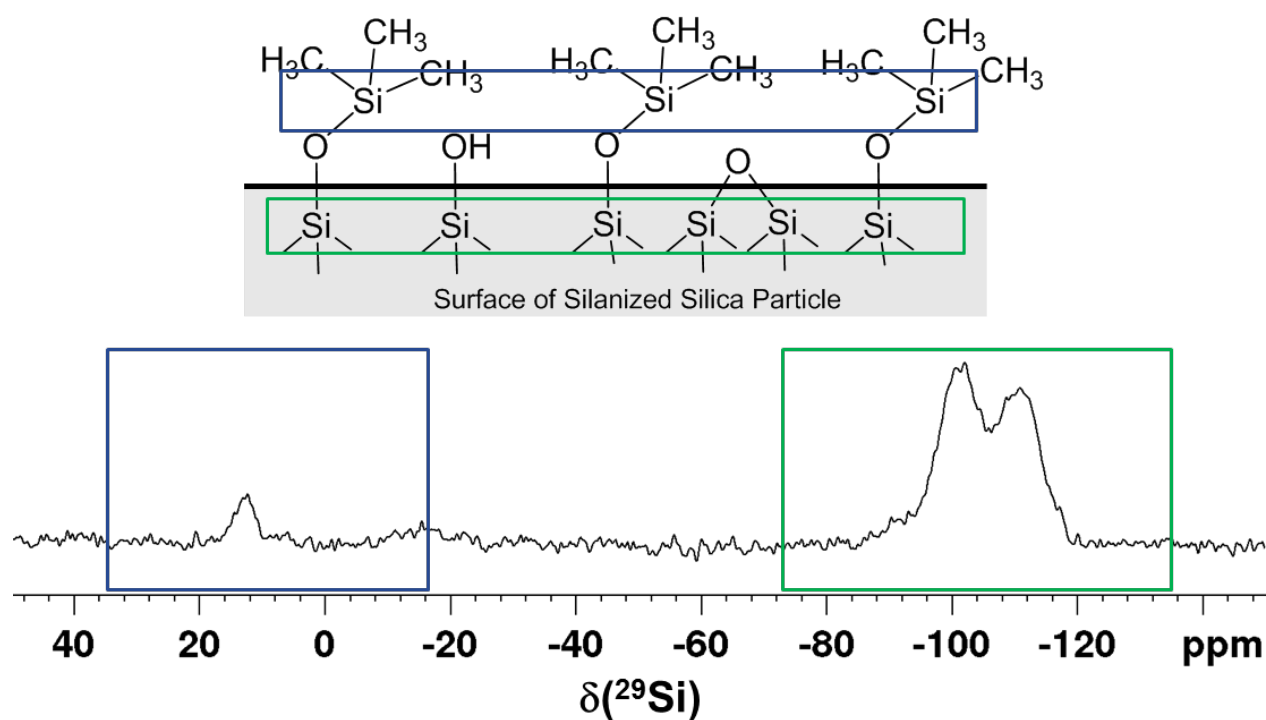

**Fig. S8**  $^{29}\text{Si}$  multiCP spectrum of the polymer-silica composite obtained by the pulse sequence of Fig. S1C. Acquisition parameters: MAS speed = 14 kHz, RD = 4.0 s,  $\tau_{\text{rel}} = 0.7$  s, contact time = 5 ms, multiCP looping number  $m = 2$  (i.e. 3 contacts in total) and accumulation of 662 scans.

## Supplementary Information

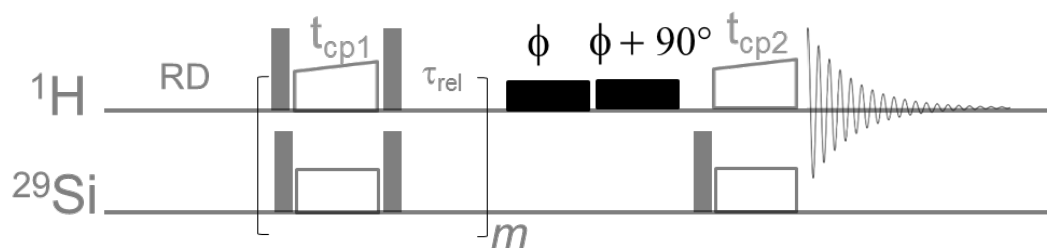

**Fig. S9** For the sample containing large organic molecule, the saturation pulse train of Fig. S1A & B was replaced by a more efficient scheme, which consists of two long out-of-phase pulses at low power (each pulse duration is 500 ms and pulse power level is 1 Watts, respectively). This saturation scheme has been reported previously.<sup>4, 5</sup>

## Supplementary Information

**Table S3.** The signal-to-noise ratio (S/N) of the DCPI/MCPi spectra of the polymer-silica composite.

| m=                                                    | Experiment time per scan, Expt/s | S/N for silanol peak (5.5 to 8.0 ppm) | S/N for water peak (3.0 to 5.0 ppm) | S/N for silane peak (0.0 to 1.0 ppm) |
|-------------------------------------------------------|----------------------------------|---------------------------------------|-------------------------------------|--------------------------------------|
| 1                                                     | 5.0600                           | 8.06                                  | 13.95                               | 24.12                                |
| 3                                                     | 7.1700                           | 11.65                                 | 18.14                               | 36.05                                |
| 6                                                     | 9.2850                           | 16.05                                 | 26.57                               | 49.21                                |
| Note: the noise region was defined from 15 to 25 ppm. |                                  |                                       |                                     |                                      |

## Supplementary Information

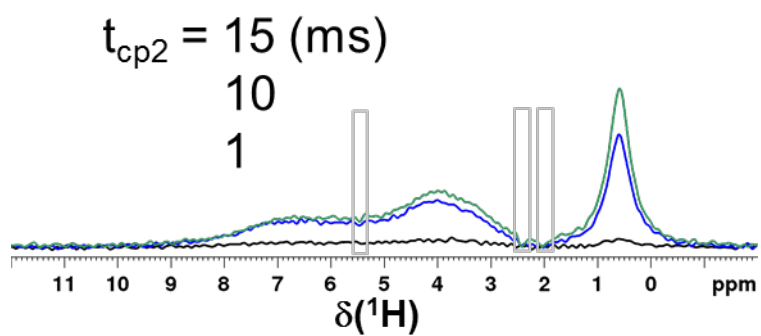

**Fig. S10**  $\{^1\text{H}-^{29}\text{Si}\}-^1\text{H}$  MCPi spectra of the polymer-silica composite obtained by a slightly modified pulse sequence (Fig. S9):  $\text{RD} = 4.0 \text{ s}$ ,  $t_{cp1} = 5 \text{ ms}$ ,  $\tau_{rel} = 0.7 \text{ s}$ ,  $m = 3$  and  $t_{cp2} = 1 \text{ ms}$  (black),  $10 \text{ ms}$  (blue) and  $15 \text{ ms}$  (green). Grey boxed are the regions where the polyisoprene signals would be expected.

# Supplementary Information

## References:

1. N. Baccile, G. Laurent, C. Bonhomme, P. Innocenzi and F. Babonneau, *Chem. Mater.*, 2007, **19**, 1343-1354.
2. R. L. Johnson and K. Schmidt-Rohr, *J. Magn. Reson.*, 2014, **239**, 44-49.
3. A. E. Bennett, R. G. Griffin, J. H. Ok and S. Vega, *The Journal of Chemical Physics*, 1992, **96**, 8624-8627.
4. J. W. Wiench, C. E. Bronnimann, V. S. Y. Lin and M. Pruski, *J. Am. Chem. Soc.*, 2007, **129**, 12076-12077.
5. N. Folliet, C. Roiland, S. Bégu, A. Aubert, T. Mineva, A. Goursot, K. Selvaraj, L. Duma, F. Tielens, F. Mauri, G. Laurent, C. Bonhomme, C. Gervais, F. Babonneau and T. Azaïs, *J. Am. Chem. Soc.*, 2011, **133**, 16815-16827.
